# Supplementary material for: Plastid phylogenomics reveals evolutionary relationships in the mycoheterotrophic orchid genus Dipodium and provides insights into plastid gene degeneration
Source: PubMed Central journal article supplement (PMC11210000; doi:10.3389/fpls.2024.1388537), 2024-06-13
Supplement: DataSheet_1.pdf [file DataSheet_1.pdf]

## Supplementary Material 1

# Plastid phylogenomics reveals evolutionary relationships in the mycoheterotrophic orchid genus *Dipodium* and provides insights into plastid gene degeneration

Stephanie Goedderz\*, Mark A. Clements, Stephen J. Bent, James A. Nicholls, Vidushi S. Patel,  
Darren M. Crayn, Philipp M. Schlüter, Katharina Nargar\*

**\* Correspondence:**

Stephanie Goedderz: [stephanie.goedderz@jcu.edu.au](mailto:stephanie.goedderz@jcu.edu.au)

Katharina Nargar: [katharina.nargar@csiro.au](mailto:katharina.nargar@csiro.au)

**Table S1.1: Taxa included in phylogenetic analysis and divergence-time estimations.** Taxonomic concepts follow CHAH (2023) <https://biodiversity.org.au/nsl/services/search/taxonomy> for Australian taxa and WFO (2023): <http://www.worldfloraonline.org> for all other regions (accessed in May 2023) except for taxa with asterisks for which a synonym was used (shown in square brackets).

| Species                                           | Subtribe       | Tribe        | Subfamily      | NCBI/ENA no.                 | DNA no.    | Included in divergence-time analysis |
|---------------------------------------------------|----------------|--------------|----------------|------------------------------|------------|--------------------------------------|
| <i>Aa paleacea</i> (Kunth) Rchb.f.                | Cranichidiinae | Cranichideae | Orchidoideae   | Givnish <i>et al.</i> (2015) | -          | yes                                  |
| <i>Acriopsis emarginata</i> D.L.Jones & M.A.Clem. | Cymbidiinae    | Cymbidieae   | Epidendroideae | ERR12947594                  | CNS_G00305 | yes                                  |
| <i>Aganisia cyanea</i> (Lindl.) Rchb.f.           | Zygopetalinae  | Cymbidieae   | Epidendroideae | Givnish <i>et al.</i> (2015) | -          | yes                                  |
| <i>Agapanthus coddii</i> F.M.Leight               | -              | -            | Outgroup       | NC 035971.1                  | -          | yes                                  |
| <i>Agave americana</i> L.                         | -              | -            | Outgroup       | NC 032053.1                  | -          | yes                                  |
| <i>Angraecum sesquipedale</i> Thouars.            | Angraecinae    | Vandaeae     | Epidendroideae | Givnish <i>et al.</i> (2015) | -          | yes                                  |
| <i>Anoectochilus emeiensis</i> K.Y.Lang           | Goodyerinae    | Cranichideae | Orchidoideae   | NC 033895.1                  | -          | yes                                  |
| <i>Aphyllorchis montana</i> Rchb.f                | -              | Neottieae    | Epidendroideae | NC 030703.1                  | -          | yes                                  |
| <i>Apostasia odorata</i> Blume                    | -              | -            | Apostasioideae | NC 030722.1                  | -          | yes                                  |
| <i>Apostasia shenzhenica</i> Z.J.Liu & L.J.Chen   | -              | -            | Apostasioideae | NC 039812.1                  | -          | yes                                  |
| <i>Apostasia wallichii</i> R.Br.                  | -              | -            | Apostasioideae | NC 036260.1                  | -          | yes                                  |

|                                                                    |                   |                |                |                                    |            |     |
|--------------------------------------------------------------------|-------------------|----------------|----------------|------------------------------------|------------|-----|
| <i>Arundina graminifolia</i> (D.Don) Hochr.                        | Arethusinae       | Arethuseae     | Epidendroideae | MN171408.1                         | -          | yes |
| <i>Asparagus officinalis</i> L.                                    | -                 | -              | Outgroup       | NC 034777.1                        | -          | yes |
| <i>Batemannia colleyi</i> Lindl.                                   | Zygopetalinae     | Cymbidieae     | Epidendroideae | Serna-Sánchez <i>et al.</i> (2021) | -          | yes |
| <i>Bletilla striata</i> Rchb.f.                                    | Coelogyninae      | Arethuseae     | Epidendroideae | NC 028422.1                        | -          | yes |
| <i>Brachionidium cruziae</i> L.O.Williams                          | Pleurothallidinae | Epidendreae    | Epidendroideae | Serna-Sánchez <i>et al.</i> (2021) | -          | yes |
| <i>Bulbophyllum inconspicuum</i> Maxim.                            | Dendrobiinae      | Malaxideae     | Epidendroideae | MN200377                           | -          | yes |
| <i>Calanthe aristulifera</i> Rchb.f.                               | -                 | Collabieae     | Epidendroideae | MN200378                           | -          | yes |
| <i>Calanthe sylvatica</i> Lindl.                                   | -                 | Collabieae     | Epidendroideae | NC 044633.1                        | -          | yes |
| <i>Calopogon tuberosus</i> (L.) Britton, Sterns & Poggenb.         | Arethusinae       | Arethuseae     | Epidendroideae | Givnish <i>et al.</i> (2015)       | -          | yes |
| <i>Calypso bulbosa</i> var. <i>occidentalis</i> (Holz.) Cockerell. | Calypsoinae       | Epidendreae    | Epidendroideae | NC 040980.1                        | -          | yes |
| <i>Catasetum integerrimum</i> Hook                                 | Catasetinae       | Cymbidieae     | Epidendroideae | Givnish <i>et al.</i> (2015)       | -          | yes |
| <i>Cattleya liliputana</i> (Pabst) Van den Berg                    | Laeliinae         | Epidendreae    | Epidendroideae | NC 032083.1                        | -          | yes |
| <i>Cephalanthera damasonium</i> Druce                              | -                 | Neottieae      | Epidendroideae | NC 041179.1                        | -          | yes |
| <i>Cephalanthera rubra</i> (L.) Rich.                              | -                 | Neottieae      | Epidendroideae | NC 041181.1                        | -          | yes |
| <i>Changnienia amoena</i> S.S.Chien.                               | Calypsoinae       | Epidendreae    | Epidendroideae | NC 045402.1                        | -          | yes |
| <i>Chaubardia surinamensis</i> Rchb.f.                             | Zygopetalinae     | Cymbidieae     | Epidendroideae | Serna-Sánchez <i>et al.</i> (2021) | -          | yes |
| <i>Cheirostylis chinensis</i> Rolfe                                | Goodyerinae       | Cranichideae   | Orchidoideae   | MN641483.1                         | -          | yes |
| <i>Codonorchis lessonii</i> Lindl.                                 | -                 | Codonorchideae | Orchidoideae   | Givnish <i>et al.</i> (2015)       | -          | yes |
| <i>Coelogyne flaccida</i> Lindl.                                   | Coelogyninae      | Arethuseae     | Epidendroideae | Givnish <i>et al.</i> (2015)       | -          | yes |
| <i>Corallorhiza striata</i> Lindl.                                 | Coelogyninae      | Arethuseae     | Epidendroideae | NC 040978.1                        | -          | yes |
| <i>Corallorhiza trifida</i> Châtel                                 | Coelogyninae      | Arethuseae     | Epidendroideae | NC 025662.1                        | -          | yes |
| <i>Coryanthes macrantha</i> Hook                                   | Stanhopeinae      | Cymbidieae     | Epidendroideae | Givnish <i>et al.</i> (2015)       | -          | yes |
| <i>Cremastra appendiculata</i> (D.Don) Makino                      | Coelogyninae      | Arethuseae     | Epidendroideae | NC 037439.1                        | -          | yes |
| <i>Cremastra unguiculata</i> Finet.                                | Coelogyninae      | Arethuseae     | Epidendroideae | MN200381                           | -          | yes |
| <i>Cymbidium aloifolium</i> (L.) Sw.                               | Cymbidiinae       | Cymbidieae     | Epidendroideae | NC 021429.1                        | -          | yes |
| <i>Cymbidium canaliculatum</i> R.Br.                               | Cymbidiinae       | Cymbidieae     | Epidendroideae | ERR12947595                        | CNS_G00165 | yes |
| <i>Cymbidium ensifolium</i> Sw.                                    | Cymbidiinae       | Cymbidieae     | Epidendroideae | NC 028525.1                        | -          | yes |
| <i>Cymbidium faberi</i> Rolfe                                      | Cymbidiinae       | Cymbidieae     | Epidendroideae | NC 027743.1                        | -          | yes |
| <i>Cymbidium floribundum</i> Lindl.                                | Cymbidiinae       | Cymbidieae     | Epidendroideae | MN173778.1                         | -          | yes |
| <i>Cymbidium lancifolium</i> Hook                                  | Cymbidiinae       | Cymbidieae     | Epidendroideae | NC 029712.1                        | -          | yes |

|                                                                                                 |               |            |                 |                                    |            |     |
|-------------------------------------------------------------------------------------------------|---------------|------------|-----------------|------------------------------------|------------|-----|
| <i>Cymbidium macrorhizon</i> Lindl.                                                             | Cymbidiinae   | Cymbidieae | Epidendroideae  | NC 029713.1                        | -          | yes |
| <i>Cymbidium crassifolium</i> Wall.                                                             | Cymbidiinae   | Cymbidieae | Epidendroideae  | NC 021433.1                        | -          | yes |
| <i>Cypripedium calceolus</i> L.                                                                 | -             | -          | Cypripedioideae | NC 045400.1                        | -          | yes |
| <i>Cypripedium japonicum</i> Thunb.                                                             | -             | -          | Cypripedioideae | NC 027227.1                        | -          | yes |
| <i>Cyrtopodium flavum</i> Link & Otto ex Rchb.                                                  | Cyrtopodiinae | Cymbidieae | Epidendroideae  | Givnish <i>et al.</i> (2015)       | -          | yes |
| <i>Dendrobium kingianum</i> Bidwill ex Lindl.                                                   | Dendrobiinae  | Malaxideae | Epidendroideae  | LC331062.1                         | -          | yes |
| <i>Dendrobium moniliforme</i> (L.) Sw.                                                          | Dendrobiinae  | Malaxideae | Epidendroideae  | MN200384                           | -          | yes |
| <i>Dichaea pendula</i> (Aubl.) Cogn.                                                            | Zygopetalinae | Cymbidieae | Epidendroideae  | Serna-Sánchez <i>et al.</i> (2021) | -          | yes |
| <i>Dipodium</i> aff. <i>roseum</i> * D.L.Jones & M.A.Clem.                                      | Dipodiinae    | Cymbidieae | Epidendroideae  | ERR12947508                        | HTCG0828   | no  |
| <i>Dipodium</i> aff. <i>roseum</i> * D.L.Jones & M.A.Clem.                                      | Dipodiinae    | Cymbidieae | Epidendroideae  | ERR12947509                        | HTCG0830   | no  |
| <i>Dipodium</i> aff. <i>roseum</i> * D.L.Jones & M.A.Clem.                                      | Dipodiinae    | Cymbidieae | Epidendroideae  | ERR12947510                        | HTCG0831   | no  |
| <i>Dipodium</i> aff. <i>roseum</i> * D.L.Jones & M.A.Clem.                                      | Dipodiinae    | Cymbidieae | Epidendroideae  | ERR12947511                        | HTCG0832   | yes |
| <i>Dipodium</i> aff. <i>stenocheilum</i> * O.Schwarz                                            | Dipodiinae    | Cymbidieae | Epidendroideae  | ERR12947512                        | HTCG1691   | no  |
| <i>Dipodium ammolithum</i> M.D.Barrett, R.L.Barrett & K.W.Dixon                                 | Dipodiinae    | Cymbidieae | Epidendroideae  | ERR12947513                        | HTCG1372   | yes |
| <i>Dipodium atropurpureum</i> D.L.Jones                                                         | Dipodiinae    | Cymbidieae | Epidendroideae  | ERR12947514                        | HTCG0760   | yes |
| <i>Dipodium atropurpureum</i> D.L.Jones                                                         | Dipodiinae    | Cymbidieae | Epidendroideae  | ERR12947515                        | HTCG1679   | no  |
| <i>Dipodium basalticum</i> M.D.Barrett, R.L.Barrett & K.W.Dixon                                 | Dipodiinae    | Cymbidieae | Epidendroideae  | ERR12947516                        | HTCG1693   | yes |
| <i>Dipodium campanulatum</i> D.L.Jones                                                          | Dipodiinae    | Cymbidieae | Epidendroideae  | ERR12947517                        | HTCG1680   | yes |
| <i>Dipodium campanulatum</i> D.L.Jones                                                          | Dipodiinae    | Cymbidieae | Epidendroideae  | ERR12947518                        | HTCG1681   | no  |
| <i>Dipodium elegantulum</i> D.L.Jones                                                           | Dipodiinae    | Cymbidieae | Epidendroideae  | ERR12947519                        | HTCG1682   | yes |
| <i>Dipodium ensifolium</i> F.Muell.                                                             | Dipodiinae    | Cymbidieae | Epidendroideae  | ERR12947520                        | HTCG1343   | yes |
| <i>Dipodium hamiltonianum</i> F.M.Bailey                                                        | Dipodiinae    | Cymbidieae | Epidendroideae  | ERR12947521                        | HTCG1683   | yes |
| <i>Dipodium hamiltonianum</i> * F.M.Bailey [syn. <i>Dipodium interaneum</i> D.L.Jones]          | Dipodiinae    | Cymbidieae | Epidendroideae  | ERR12947522                        | HTCG0181   | yes |
| <i>Dipodium pandanum</i> F.M.Bailey                                                             | Dipodiinae    | Cymbidieae | Epidendroideae  | ERR12947593                        | CNS_G01262 | yes |
| <i>Dipodium pandanum</i> F.M.Bailey                                                             | Dipodiinae    | Cymbidieae | Epidendroideae  | ERR12947523                        | HTCG1694   | no  |
| <i>Dipodium pardalinum</i> D.L.Jones                                                            | Dipodiinae    | Cymbidieae | Epidendroideae  | ERR12947524                        | HTCG1684   | yes |
| <i>Dipodium pardalinum</i> D.L.Jones                                                            | Dipodiinae    | Cymbidieae | Epidendroideae  | ERR12947525                        | HTCG1685   | no  |
| <i>Dipodium punctatum</i> * (Sm.) R.Br. [syn. <i>Dipodium pulchellum</i> D.L.Jones & M.A.Clem.] | Dipodiinae    | Cymbidieae | Epidendroideae  | ERR12947526                        | HTCG1686   | yes |
| <i>Dipodium punctatum</i> (Sm.) R.Br.                                                           | Dipodiinae    | Cymbidieae | Epidendroideae  | ERR12947527                        | HTCG0827   | yes |
| <i>Dipodium roseum</i> D.L.Jones & M.A.Clem.                                                    | Dipodiinae    | Cymbidieae | Epidendroideae  | MN200386                           | -          | no  |

|                                                                |               |              |                |                                    |            |     |
|----------------------------------------------------------------|---------------|--------------|----------------|------------------------------------|------------|-----|
| <i>Dipodium roseum</i> D.L.Jones & M.A.Clem.                   | Dipodiinae    | Cymbidieae   | Epidendroideae | ERR12947528                        | HTCG1687   | yes |
| <i>Dipodium roseum</i> D.L.Jones & M.A.Clem.                   | Dipodiinae    | Cymbidieae   | Epidendroideae | ERR12947529                        | HTCG1688   | no  |
| <i>Dipodium stenocheilum</i> O.Schwarz                         | Dipodiinae    | Cymbidieae   | Epidendroideae | ERR12947530                        | HTCG1689   | no  |
| <i>Dipodium stenocheilum</i> O.Schwarz                         | Dipodiinae    | Cymbidieae   | Epidendroideae | ERR12947531                        | HTCG1690   | yes |
| <i>Dipodium variegatum</i> M.A.Clem. & D.L.Jones               | Dipodiinae    | Cymbidieae   | Epidendroideae | ERR12947532                        | HTCG1692   | yes |
| <i>Elleanthus sodiroi</i> Schltr.                              | -             | Sobralieae   | Epidendroideae | NC 027266.1                        | -          | yes |
| <i>Epipactis mairei</i> Schltr.                                | -             | Neottieae    | Epidendroideae | NC 030705.1                        | -          | yes |
| <i>Epipactis thunbergia</i> A.Gray.                            | -             | Neottieae    | Epidendroideae | MN200387                           | -          | yes |
| <i>Epipactis veratrifolia</i> Boiss. & ...                     | -             | Neottieae    | Epidendroideae | NC 030708.1                        | -          | yes |
| <i>Eria scabrilinguis</i> Lindl.                               | -             | Podochileae  | Epidendroideae | MN477202.1                         | -          | yes |
| <i>Eulophia bicallosa</i> (D.Don) P.F.Hunt & Summerh.          | Eulophiinae   | Cymbidieae   | Epidendroideae | ERR12947533                        | HTCG1696   | yes |
| <i>Eulophia graminea</i> Lindl.                                | Eulophiinae   | Cymbidieae   | Epidendroideae | ERR12947596                        | CNS_G02766 | yes |
| <i>Eulophia nuda</i> Lindl.                                    | Eulophiinae   | Cymbidieae   | Epidendroideae | ERR12947534                        | HTCG1697   | yes |
| <i>Eulophia petersii</i> Rchb.f.                               | Eulophiinae   | Cymbidieae   | Epidendroideae | Givnish <i>et al.</i> (2015)       | -          | no  |
| <i>Evetella carnosa</i> (Lindl.) J.C.Manning & Goldblatt       | Coryciinae    | Orchideae    | Orchidoideae   | Givnish <i>et al.</i> (2015)       | -          | yes |
| <i>Gastrochilus japonicus</i> Schltr.                          | Aeridinae     | Vandaeae     | Epidendroideae | NC 035833.1                        | -          | yes |
| <i>Geodorum densiflorum</i> (Lam.) Schltr.                     | Eulophiinae   | Cymbidieae   | Epidendroideae | ERR12947597                        | CNS_G01890 | yes |
| <i>Gongora pleiochroma</i> Rchb.f.                             | Stanhopeinae  | Cymbidieae   | Epidendroideae | Givnish <i>et al.</i> (2015)       | -          | yes |
| <i>Goodyera fumata</i> Thwaites.                               | Goodyerinae   | Cranichideae | Orchidoideae   | NC 026773.1                        | -          | yes |
| <i>Goodyera schlechtendaliana</i> Rchb.f.                      | Goodyerinae   | Cranichideae | Orchidoideae   | MK134679.1                         | -          | yes |
| <i>Guarianthe aurantiaca</i> (Bateman) Dressler & W.E.Higgins. | Laeliinae     | Epidendreae  | Epidendroideae | Givnish <i>et al.</i> (2015)       | -          | yes |
| <i>Gymnadenia conopsea</i> (L.) R.Br.                          | Orchidinae    | Orchideae    | Orchidoideae   | MN200391                           | -          | yes |
| <i>Habenaria arenaria</i> Lindl.                               | Orchidinae    | Orchideae    | Orchidoideae   | Givnish <i>et al.</i> (2015)       | -          | yes |
| <i>Habenaria ciliolaris</i> Kraenzl.                           | Orchidinae    | Orchideae    | Orchidoideae   | MN495954.1                         | -          | yes |
| <i>Hexalectris warnockii</i> Ames & Correll.                   | Laeliinae     | Epidendreae  | Epidendroideae | MH444822.1                         | -          | yes |
| <i>Holcoglossum lingulatum</i> (Aver.) Aver.                   | Aeridinae     | Vandaeae     | Epidendroideae | NC 041465.1                        | -          | yes |
| <i>Holcoglossum subulifolium</i> (Rchb.f.) Christenson.        | Aeridinae     | Vandaeae     | Epidendroideae | NC 041519.1                        | -          | yes |
| <i>Huntleya meleagris</i> Lindl.                               | Zygopetalinae | Cymbidieae   | Epidendroideae | Serna-Sánchez <i>et al.</i> (2021) | -          | yes |
| <i>Iris sanguinea</i> Hornem                                   | -             | -            | Outgroup       | NC 029227.1                        | -          | yes |
| <i>Lilium pensylvanicum</i> Ker Gawl.                          | -             | -            | Outgroup       | NC 043876.1                        | -          | yes |

|                                                                                |                   |              |                 |                                    |          |     |
|--------------------------------------------------------------------------------|-------------------|--------------|-----------------|------------------------------------|----------|-----|
| <i>Liparis auriculata</i> Blume ex Miq.                                        | Malaxidinae       | Malaxideae   | Epidendroideae  | MN200365                           | -        | yes |
| <i>Ludisia discolor</i> (Ker Gawl.) Blume                                      | Goodyerinae       | Cranichideae | Orchidoideae    | NC 030540.1                        | -        | yes |
| <i>Masdevallia coccinea</i> Linden ex Lindl.                                   | Pleurothallidinae | Epidendreae  | Epidendroideae  | NC 026541.1                        | -        | yes |
| <i>Maxillaria nasuta</i> Rchb.f.                                               | Maxillariinae     | Cymbidieae   | Epidendroideae  | Givnish <i>et al.</i> (2015)       | -        | yes |
| <i>Maxillaria sandariana</i> Rchb.f. ex Sander                                 | Maxillariinae     | Cymbidieae   | Epidendroideae  | Givnish <i>et al.</i> (2015)       | -        | yes |
| <i>Neottia listeroides</i> Lindl.                                              | -                 | Neottieae    | Epidendroideae  | NC_030713.1                        | -        | no  |
| <i>Neottia ovata</i> Bluff & Fingerh.                                          | -                 | Neottieae    | Epidendroideae  | NC 030712.1                        | -        | yes |
| <i>Nervilia simplex</i> (Spreng.) Schltr.                                      | -                 | Nervilieae   | Epidendroideae  | Givnish <i>et al.</i> (2015)       | -        | no  |
| <i>Neuwiedia zollingeri</i> var. <i>singaporeana</i> (Wall. ex Baker) de Vogel | -                 | -            | Apostasioideae  | LC199503.1                         | -        | yes |
| <i>Oberonia japonica</i> (Maxim.) Makino                                       | Malaxidinae       | Malaxideae   | Epidendroideae  | NC 035832.1                        | -        | yes |
| <i>Oeceoclades pelorica</i> (D.L.Jones & M.A.Clem.) D.L.Jones & M.A.Clem.      | Eulophiinae       | Cymbidieae   | Epidendroideae  | ERR12947535                        | HTCG1695 | yes |
| <i>Oncidium sphacelatum</i> Lindl.                                             | Oncidiinae        | Cymbidieae   | Epidendroideae  | NC 028148.1                        | -        | yes |
| <i>Ophrys fusca</i> subsp. <i>iricolor</i> * (Desf.) K.Richt.                  | Orchidinae        | Orchideae    | Orchidoideae    | AP018716.1                         | -        | yes |
| <i>Ophrys sphegodes</i> Mill.                                                  | Orchidinae        | Orchideae    | Orchidoideae    | AP018717.1                         | -        | yes |
| <i>Otoglossum globuliferum</i> (Kunth) N.H.Williams & M.W.Chase                | Zygopetalinae     | Cymbidieae   | Epidendroideae  | Serna-Sánchez <i>et al.</i> (2021) | -        | yes |
| <i>Otostylis brachystali</i> Schltr.                                           | Zygopetalinae     | Cymbidieae   | Epidendroideae  | Serna-Sánchez <i>et al.</i> (2021) | -        | yes |
| <i>Pabstia jugosa</i> (Lindl.) Garay.                                          | Zygopetalinae     | Cymbidieae   | Epidendroideae  | Serna-Sánchez <i>et al.</i> (2021) | -        | yes |
| <i>Palmorchis pabstii</i> Veyret.                                              | -                 | Neottieae    | Epidendroideae  | NC 041190.1                        | -        | yes |
| <i>Paphiopedilum armeniacum</i> S.C.Chen & F.Y.Liu.                            | -                 | -            | Cypripedioideae | NC 026779.1                        | -        | yes |
| <i>Paphiopedilum niveum</i> (Rchb.f.) Stein                                    | -                 | -            | Cypripedioideae | NC 026776.1                        | -        | yes |
| <i>Pelatantheria scolopendrifolia</i> (Makino) Aver.                           | Aeridinae         | Vandaeae     | Epidendroideae  | NC 035829.1                        | -        | yes |
| <i>Pescatoria wallisii</i> Linden & Rchb.f.                                    | Zygopetalinae     | Cymbidieae   | Epidendroideae  | Serna-Sánchez <i>et al.</i> (2021) | -        | yes |
| <i>Phaius tankervilleae</i> (Banks) Blume.                                     | -                 | Collabieae   | Epidendroideae  | Givnish <i>et al.</i> (2015)       | -        | yes |
| <i>Phalaenopsis japonica</i> (Rchb.f.) Kocyan & Schuit.                        | Aeridinae         | Vandaeae     | Epidendroideae  | Givnish <i>et al.</i> (2015)       | -        | yes |
| <i>Phalaenopsis pulcherrima</i> (Lindl.) J.J.Sm.                               | Aeridinae         | Vandaeae     | Epidendroideae  | MG459020.1                         | -        | yes |
| <i>Phragmipedium longifolium</i> (Rchb.f. & Warsz.) Rolfe                      | -                 | -            | Cypripedioideae | NC 028149.1                        | -        | yes |
| <i>Platanthera mandarinorum</i> Rchb.f.                                        | Orchidinae        | Orchideae    | Orchidoideae    | MN200370                           | -        | yes |
| <i>Platystele aurea</i> Garay.                                                 | Pleurothallidinae | Epidendreae  | Epidendroideae  | Serna-Sánchez <i>et al.</i> (2021) | -        | yes |
| <i>Pleione formosana</i> Hayata                                                | Coelogyntinae     | Arethuseae   | Epidendroideae  | NC 042197.1                        | -        | yes |
| <i>Pogonia ophioglossoides</i> (L.) Ker Gawl.                                  | -                 | Pogonieae    | Vanilloideae    | Givnish <i>et al.</i> (2015)       | -        | yes |

|                                                                |                   |              |                |                                    |   |     |
|----------------------------------------------------------------|-------------------|--------------|----------------|------------------------------------|---|-----|
| <i>Ponerorchis gracilis</i> (Blume) X.H.Jin, Schuit. & W.T.Jin | Orchidinae        | Orchideae    | Orchidoideae   | MN200376                           | - | yes |
| <i>Scaphosepalum antenniferum</i> Rolfe.                       | Pleurothallidinae | Epidendreae  | Epidendroideae | Serna-Sánchez <i>et al.</i> (2021) | - | yes |
| <i>Sobralia mucronate</i> Ames & C.Schweinf.                   | -                 | Sobralieae   | Epidendroideae | Givnish <i>et al.</i> (2015)       | - | yes |
| <i>Spiranthes sinensis</i> (Pers.) Ames                        | Spiranthinae      | Cranichideae | Orchidoideae   | MK936427.1                         | - | yes |
| <i>Teagueia</i> (Luer) Luer.                                   | Pleurothallidinae | Epidendreae  | Epidendroideae | Serna-Sánchez <i>et al.</i> (2021) | - | yes |
| <i>Telipogon glicensteinii</i> Dodson & R.Escobar              | Oncidiinae        | Cymbidieae   | Epidendroideae | Givnish <i>et al.</i> (2015)       | - | yes |
| <i>Thelymitra cyanea</i> (Lindl.) Benth.                       | Thelymitrinae     | Diurideae    | Orchidoideae   | Givnish <i>et al.</i> (2015)       | - | yes |
| <i>Thrixspermum japonicum</i> Rchb.f.                          | Aeridinae         | Vandaeae     | Epidendroideae | NC 035831.2                        | - | yes |
| <i>Triphora trianthophora</i> (Sw.) Rydb.                      | Triphorinae       | Triphoreae   | Epidendroideae | Givnish <i>et al.</i> (2015)       | - | no  |
| <i>Tropidia polystachya</i> Ames.                              | -                 | Tropidieae   | Epidendroideae | Givnish <i>et al.</i> (2015)       | - | yes |
| <i>Vanda brunnea</i> Rchb.f.                                   | Aeridinae         | Vandaeae     | Epidendroideae | NC 041522.1                        | - | yes |
| <i>Vanda falcata</i> Beer.                                     | Aeridinae         | Vandaeae     | Epidendroideae | NC 036372.1                        | - |     |
| <i>Vanilla aphylla</i> Blume                                   | -                 | Vanilleae    | Vanilloideae   | NC 035320.1                        | - | yes |
| <i>Vanilla planifolia</i> Andrews                              | -                 | Vanilleae    | Vanilloideae   | NC 026778.1                        | - | yes |
| <i>Vanilla pompona</i> Schiede                                 | -                 | Vanilleae    | Vanilloideae   | NC 036809.1                        | - | yes |
| <i>Zootrophion hirtzii</i> Luer.                               | Pleurothallidinae | Epidendreae  | Epidendroideae | Serna-Sánchez <i>et al.</i> (2021) | - | yes |
| <i>Zygopetalum triste</i> Barb.Rodr.                           | Zygopetalinae     | Cymbidieae   | Epidendroideae | Serna-Sánchez <i>et al.</i> (2021) | - | yes |

## References

Givnish, T. J., Spalink, D., Ames, M., Lyon, S. P., Hunter, S. J., Zuluaga, A., et al. (2015). Orchid phylogenomics and multiple drivers of their extraordinary diversification. *Proc. R. Soc B* 282, 20151553. doi: 10.1098/rspb.2015.1553

Serna-Sánchez, M. A., Pérez-Escobar, O. A., Bogarín, D., Torres-Jimenez, M. F., Alvarez-Yela, A. C., Arcila-Galvis, J. E., et al. (2021). Plastid phylogenomics resolves ambiguous relationships within the orchid family and provides a solid timeframe for biogeography and macroevolution. *Sci. Rep.* 11, 6858. doi: 10.1038/s41598-021-83664-5
