# Supplementary material for: Plastid phylogenomics reveals evolutionary relationships in the mycoheterotrophic orchid genus Dipodium and provides insights into plastid gene degeneration
Source: PubMed Central journal article supplement (PMC11210000; doi:10.3389/fpls.2024.1388537), 2024-06-13
Supplement: DataSheet_4.pdf [file DataSheet_4.pdf]

## *Supplementary Material 5*

# Plastid phylogenomics reveals evolutionary relationships in the mycoheterotrophic orchid genus *Dipodium* and provides insights into plastid gene degeneration

Stephanie Goedderz<sup>\*</sup>, Mark A. Clements, Stephen J. Bent, James A. Nicholls, Vidushi S. Patel, Darren M. Crayn, Philipp M. Schlüter, Katharina Nargar<sup>\*</sup>

**\* Correspondence:**

Stephanie Goedderz: [stephanie.goedderz@jcu.edu.au](mailto:stephanie.goedderz@jcu.edu.au)

Katharina Nargar: [katharina.nargar@csiro.au](mailto:katharina.nargar@csiro.au)

Maximum-clade-credibility tree from Bayesian divergence-time estimations of Orchidaceae.

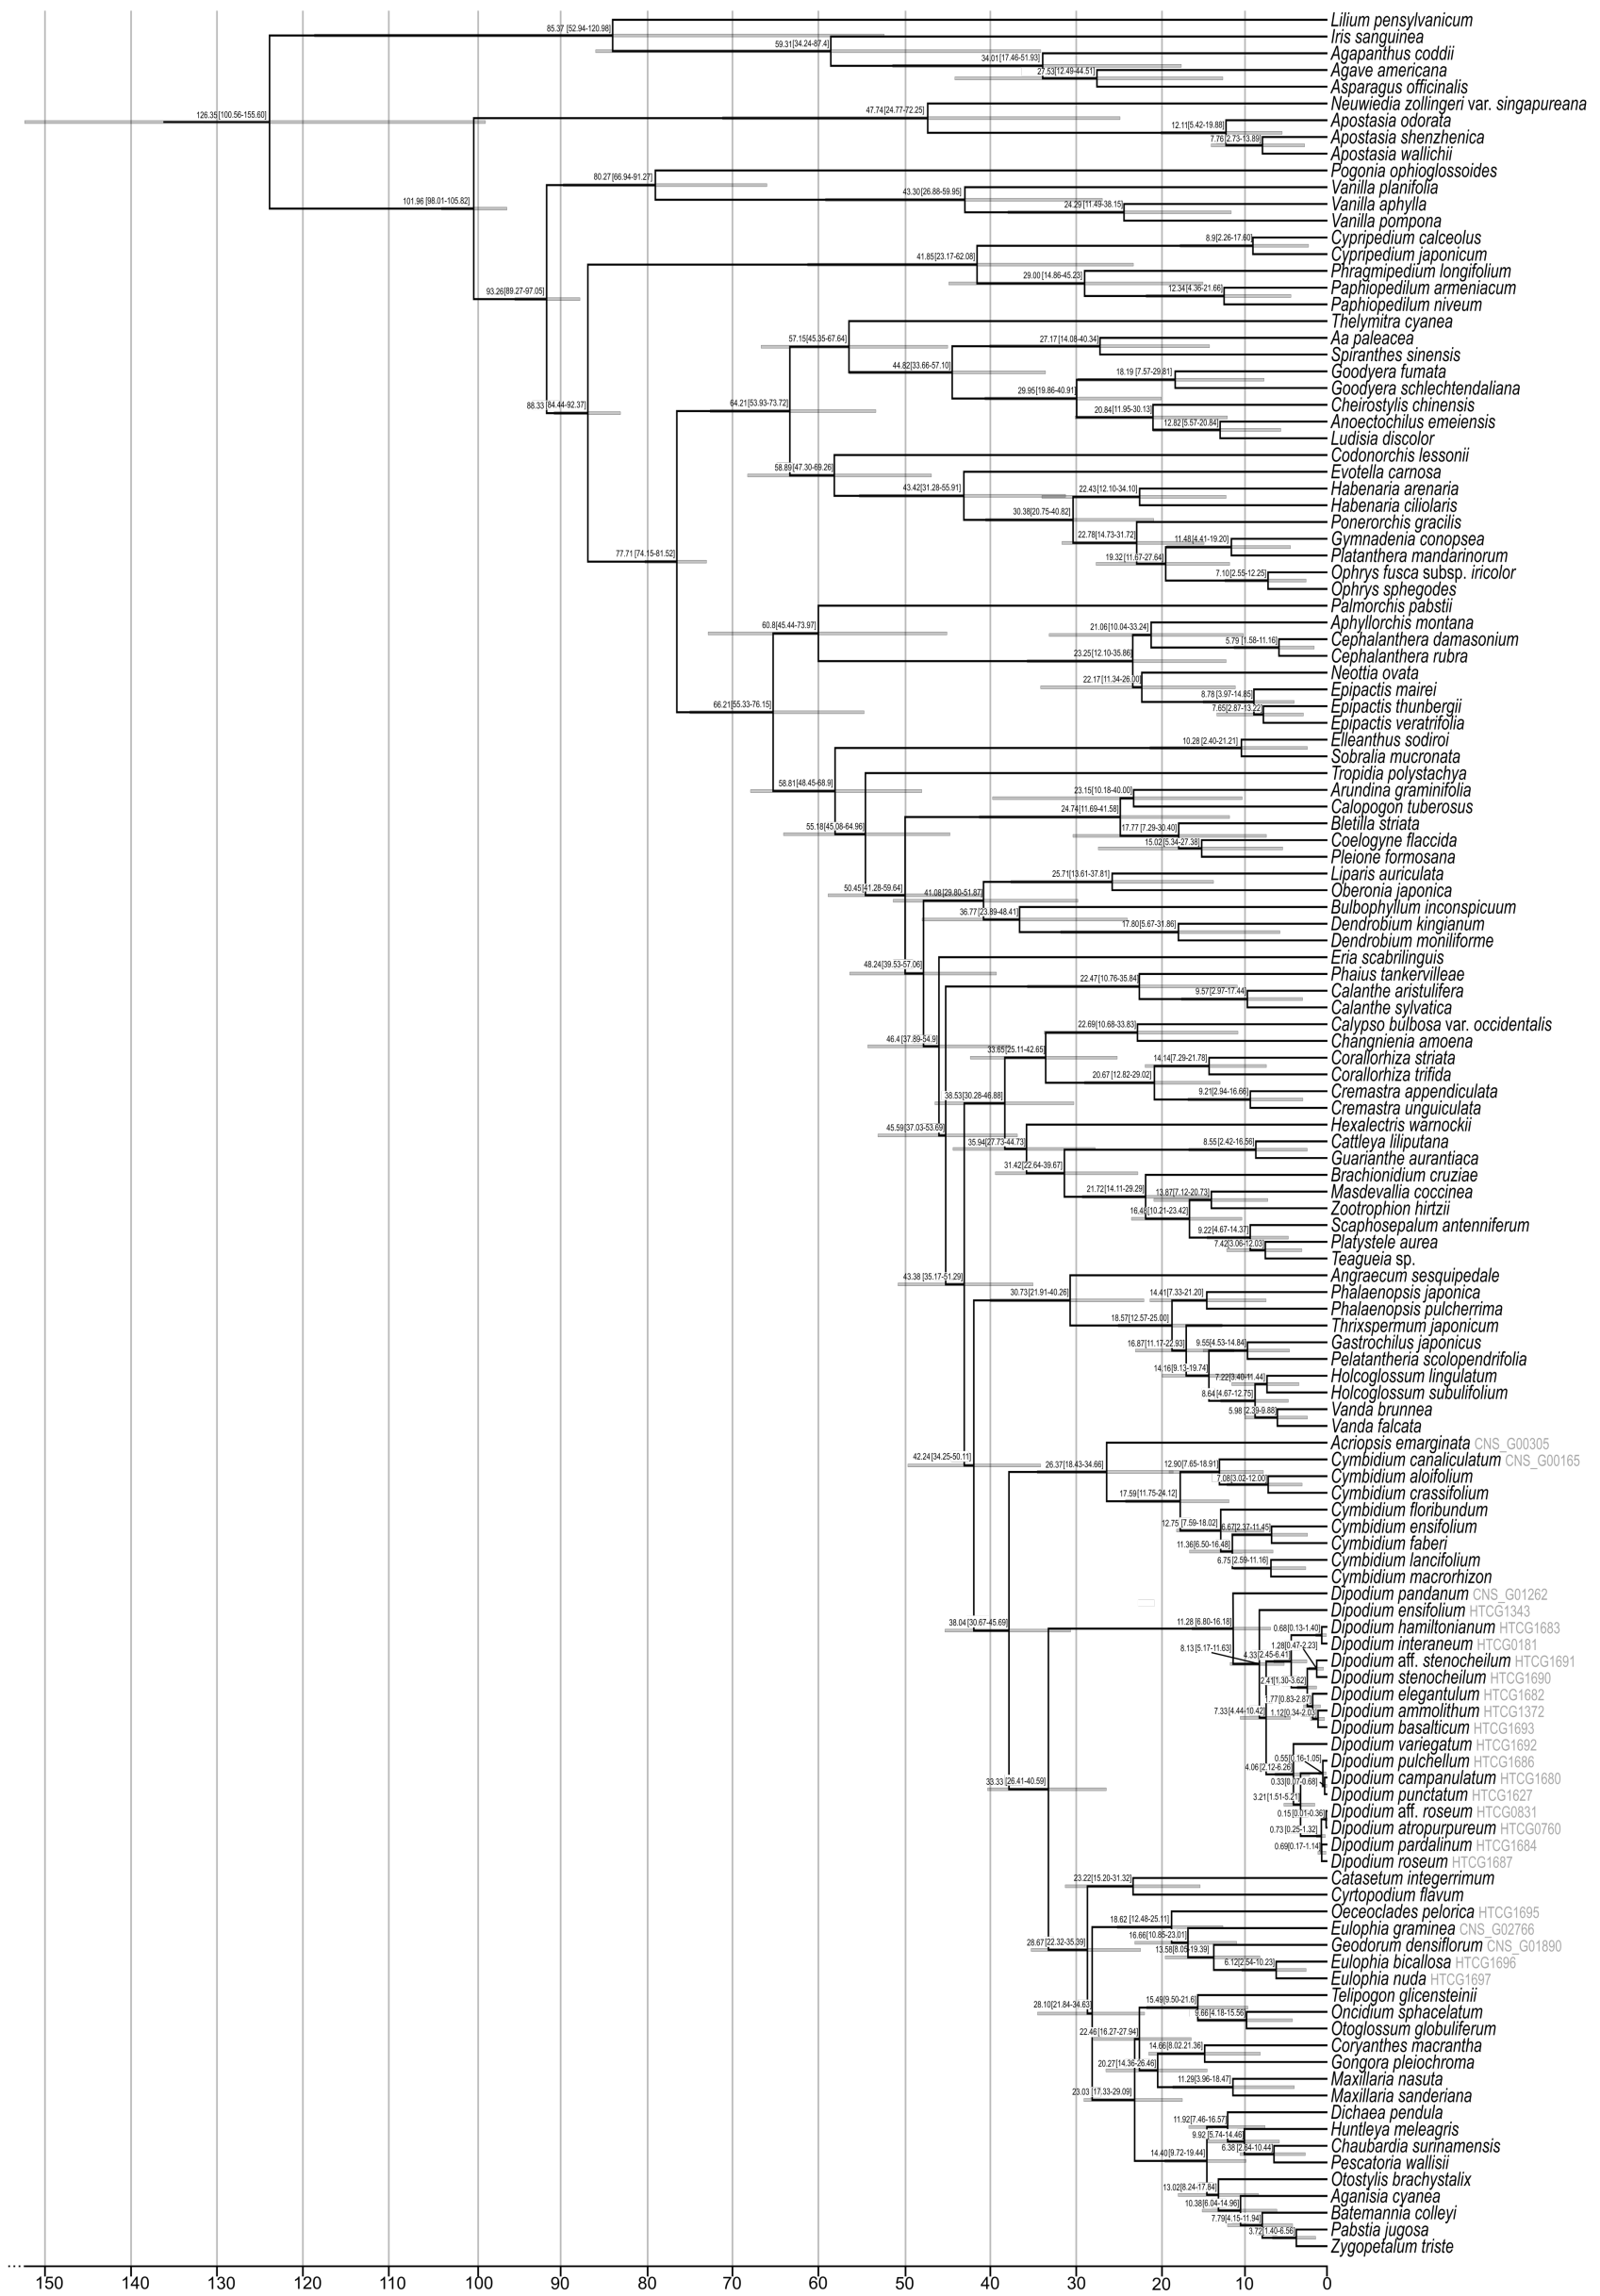

**Figure S5.1: Chronogram of Orchidaceae.** Maximum-clade-credibility tree from Bayesian divergence-time estimation in BEAST2 based on 30 plastid loci, 134T and an optimised relaxed molecular clock model under the birth-death prior. Divergence times (million years ago) are shown at each node, together with 95% highest posterior density (HDP) values indicated by grey bars and values in parentheses.
