# Supplementary material for: Plastid phylogenomics reveals evolutionary relationships in the mycoheterotrophic orchid genus Dipodium and provides insights into plastid gene degeneration
Source: PubMed Central journal article supplement (PMC11210000; doi:10.3389/fpls.2024.1388537), 2024-06-13
Supplement: DataSheet_5.pdf [file DataSheet_5.pdf]

## Supplementary Material 6

# Plastid phylogenomics reveals evolutionary relationships in the mycoheterotrophic orchid genus *Dipodium* and provides insights into plastid gene degeneration

Stephanie Goedderz\*, Mark A. Clements, Stephen J. Bent, James A. Nicholls, Vidushi S. Patel, Darren M. Crayn, Philipp M. Schlüter, Katharina Nargar\*

**\* Correspondence:**

Stephanie Goedderz: [stephanie.goedderz@jcu.edu.au](mailto:stephanie.goedderz@jcu.edu.au)

Katharina Nargar: [katharina.nargar@csiro.au](mailto:katharina.nargar@csiro.au)

**Table S6.1:** Summary of the reference-guided assembly features of 24 *Dipodium* plastomes reconstructed in this study.

|    | Sample                                      | # trimmed reads | # mapped reads | mean coverage |
|----|---------------------------------------------|-----------------|----------------|---------------|
| 1  | <i>Dipodium ammolithum</i> HTCG1372         | 8,131,829       | 51,851         | 63            |
| 2  | <i>Dipodium atropurpureum</i> HTCG0760      | 3,802,046       | 114,178        | 166           |
| 3  | <i>Dipodium atropurpureum</i> HTCG1679      | 5,293,802       | 76,117         | 71            |
| 4  | <i>Dipodium basalticum</i> HTCG1693         | 7,476,898       | 56,106         | 73            |
| 5  | <i>Dipodium campanulatum</i> HTCG1680       | 4,928,715       | 33,297         | 31            |
| 6  | <i>Dipodium campanulatum</i> HTCG1681       | 4,714,583       | 65,257         | 75            |
| 7  | <i>Dipodium elegantulum</i> HTCG1682        | 5,696,744       | 40,461         | 48            |
| 8  | <i>Dipodium ensifolium</i> HTCG1343         | 11,895,622      | 483,386        | 627           |
| 9  | <i>Dipodium hamiltonianum</i> HTCG1683      | 11,327,386      | 54,724         | 63            |
| 10 | <i>Dipodium interaneum</i> HTCG0181         | 3,709,623       | 53,624         | 75            |
| 11 | <i>Dipodium pandanum</i> CNS_G01262         | 332,604         | 89,782         | 204           |
| 12 | <i>Dipodium pardalinum</i> HTCG1684         | 8,086,850       | 70,697         | 67            |
| 13 | <i>Dipodium pardalinum</i> HTCG1685         | 27,999,734      | 201,257        | 198           |
| 14 | <i>Dipodium pulchellum</i> HTCG1686         | 6,795,229       | 85,282         | 93            |
| 15 | <i>Dipodium punctatum</i> HTCG0827          | 8,987,460       | 90,899         | 120           |
| 16 | <i>Dipodium roseum</i> HTCG1687             | 7,399,306       | 90,802         | 101           |
| 17 | <i>Dipodium roseum</i> HTCG1688             | 6,207,464       | 52,233         | 50            |
| 18 | <i>Dipodium</i> aff. <i>roseum</i> HTCG0828 | 7,953,368       | 251,830        | 353           |
| 19 | <i>Dipodium</i> aff. <i>roseum</i> HTCG0830 | 4,347,368       | 56,127         | 74            |
| 20 | <i>Dipodium</i> aff. <i>roseum</i> HTCG0831 | 11,388,084      | 357,584        | 475           |
| 21 | <i>Dipodium</i> aff. <i>roseum</i> HTCG0832 | 10,706,617      | 244,503        | 336           |
| 22 | <i>Dipodium stenocheilum</i> HTCG1689       | 4,657,080       | 38,117         | 44            |
| 23 | <i>Dipodium stenocheilum</i> HTCG1690       | 6,026,488       | 37,602         | 47            |
| 24 | <i>Dipodium variegatum</i> HTCG1692         | 4,256,510       | 41,813         | 44            |

**Table S6.2:** Comparison of the de novo assembled contigs/ plastomes using SPAdes 3.15 (Bankevich et al., 2012) and GetOrganelle v1.7.7.0 (Jin et al., 2020).

| Sample name                                     | GetOrganelle # contigs | GetOrganelle total length [bp] | GetOrganelle longest contig [bp] | GetOrganelle >10kb [bp]                  | SPAdes #contigs | SPAdes total length [bp] | SPAdes longest contig [bp] | SPAdes >10kb [bp]                                                    |
|-------------------------------------------------|------------------------|--------------------------------|----------------------------------|------------------------------------------|-----------------|--------------------------|----------------------------|----------------------------------------------------------------------|
| <i>Dipodium basalticum</i> HTCG1693             | 28                     | 108241                         | 13089                            | 10,972; 13,089                           | 18              | 306064                   | 41889                      | 41889; 40051; 29646; 28302; 22640; 22065; 15996; 15808; 14491; 12338 |
| <i>Dipodium</i> aff. <i>roseum</i> HTCG0828 (1) | 40                     | 58705                          | 5569                             | 0                                        | 17              | 305446                   | 39361                      | 39361; 27557; 23221; 22753; 22402; 20460; 20442; 18521; 17904; 17070 |
| <i>Dipodium</i> aff. <i>roseum</i> HTCG0830 (2) | 8                      | 132923                         | 53547                            | 53427; 26121; 10599; 21193               | 13              | 265211                   | 33140                      | 33140; 31225; 31104; 23134; 21584; 20739; 20458; 20452; 18339; 17910 |
| <i>Dipodium</i> aff. <i>roseum</i> HTCG0831 (3) | 13                     | 43008                          | 3786                             | 0                                        | 19              | 338511                   | 57035                      | 57035; 23060; 22753; 22369; 21584; 20469; 20460; 18397; 17910; 17070 |
| <i>Dipodium</i> aff. <i>roseum</i> HTCG0832 (4) | 36                     | 37103                          | 2318                             | 0                                        | 18              | 332877                   | 39684                      | 39684; 39400; 22753; 22410; 21584; 20469; 20460; 18504; 17409; 17359 |
| <i>Dipodium ammolithum</i> HTCG1372             | 6                      | 140712                         | 81300                            | 81300; 21854; 16752; 10269               | 8               | 197021                   | 81090                      | 81090; 37009; 20633; 17961; 13643; 10059                             |
| <i>Dipodium atropurpureum</i> HTCG0760 (1)      | complete plastome      | 141316                         | complete plastome                | 141316                                   | 18              | 272124                   | 39684                      | 39684; 30614; 22765; 21584; 20492; 17070; 16960; 14393; 13912; 12535 |
| <i>Dipodium atropurpureum</i> HTCG1679 (2)      | 47                     | 84434                          | 10229                            | 10229                                    | 10              | 168241                   | 68294                      | 68294; 22788; 13311; 12598; 12079; 10315                             |
| <i>Dipodium campanulatum</i> HTCG1680 (1)       | 9                      | 145432                         | 38520                            | 38520; 30377; 16715; 14536; 12071; 10604 | 9               | 140791                   | 43054                      | 43054; 28351; 27754                                                  |
| <i>Dipodium campanulatum</i> HTCG1681 (2)       | 7                      | 134128                         | 44014                            | 44014; 38521; 24561; 10604               | 7               | 137437                   | 82450                      | 82450; 16531; 10394                                                  |
| <i>Dipodium elegantulum</i> HTCG1682            | 4                      | 150831                         | 138555                           | 138555                                   | 3               | 123154                   | 67784                      | 67784; 49042                                                         |
| <i>Dipodium ensifolium</i> HTCG1343             | 37                     | 56060                          | 3685                             | 0                                        | 15              | 305519                   | 38664                      | 38664; 33336; 32359; 31601; 26839; 20536; 18720; 17566; 16943; 16591 |
| <i>Dipodium interaneum</i> HTCG0181             | 6                      | 127444                         | 81192                            | 81192; 31337                             | 8               | 152820                   | 70574                      | 70574; 22365; 15180; 11904                                           |
| <i>Dipodium hamiltonianum</i> HTCG1683          | 52                     | 51631                          | 3203                             | 0                                        | 6               | 145596                   | 81141                      | 81141; 22366; 19288                                                  |
| <i>Dipodium pandanum</i> CNS_G01262             | complete plastome      | 143979                         | complete plastome                | 143979                                   | 7               | 125920                   | 55296                      | 55296; 17440; 14330; 13191; 11102                                    |
| <i>Dipodium pardalinum</i> HTCG1684 (1)         | 44                     | 93561                          | 7660                             | 0                                        | 13              | 194321                   | 54563                      | 54563; 19255; 15339; 13815; 13806; 12546; 11985; 11063; 10489        |
| <i>Dipodium pardalinum</i> HTCG1685 (2)         | 27                     | 16042                          | 1158                             | 0                                        | 0               | 0                        |                            | 0                                                                    |

|                                           |    |        |        |                               |    |        |       |                                                                         |
|-------------------------------------------|----|--------|--------|-------------------------------|----|--------|-------|-------------------------------------------------------------------------|
| <i>Dipodium pulchellum</i> HTCG1686       | 20 | 120129 | 34366  | 19368; 19512; 34366           | 11 | 175871 | 38565 | 38565; 29858; 19264; 16360;<br>14588; 14401; 13030; 10366               |
| <i>Dipodium punctatum</i> HTCG0827        | 26 | 108558 | 19272  | 19272; 14329; 10024           | 17 | 342074 | 68439 | 68439; 40469; 32514; 22763; 20393;<br>19103; 18534; 16540; 16485; 16439 |
| <i>Dipodium roseum</i> HTCG1687 (1)       | 50 | 46137  | 3647   | 0                             | 12 | 237983 | 47608 | 47608; 44249; 30891; 25429;<br>18214; 15651; 11923; 10366               |
| <i>Dipodium roseum</i> HTCG1688 (2)       | 56 | 68870  | 4307   | 0                             | 6  | 148369 | 97218 | 97218; 15046; 11293; 10367                                              |
| <i>Dipodium stenocheilum</i> HTCG1689 (1) | 11 | 129308 | 46908  | 46908; 32560; 12328;<br>10074 | 8  | 126692 | 48177 | 48177; 25386; 13993; 10269                                              |
| <i>Dipodium stenocheilum</i> HTCG1690 (2) | 3  | 150561 | 140419 | 140419                        | 5  | 133489 | 61553 | 61553; 49257                                                            |
| <i>Dipodium variegatum</i> HTCG1692       | 37 | 110519 | 25631  | 25631                         | 7  | 145577 | 64742 | 64742; 33447; 19561                                                     |
